# Supplementary material for: Quadruple Target Evaluation of Diversity-Optimized Halogen-Enriched Fragments (HEFLibs) Reveals Substantial Ligand Efficiency for AP2-Associated Protein Kinase 1 (AAK1)
Source: Front Chem. 2022 Feb 2;9:815567. doi: 10.3389/fchem.2021.815567 (PMC8847695; doi:10.3389/fchem.2021.815567)
Supplement: Supplementary file 1 [file Table1.XLSX]

## Sheet: Datasheet 1
SMILES	Barcode	SlogP	TPSA	HBD	HBA	HBD+HBA	HA	MW	Hits	Vmax	Vmax_2	AAK1	CAMK1G	DOT1L	IDO1	Sum
[NH3+]C(CCO)c1ccc(Cl)cc1Cl	B02289594	1.6588	47.87	2	1	3	13	221.107	0	0.266	0.229	0	0	0	0	0
Clc1ncnc2cc[nH]c12	B02289595	1.6113	41.57	1	2	3	10	153.572	2	0.13		1	1	0	0	2
Cc1noc(C)c1Br	B02289596	2.05394	26.03	0	2	2	8	176.013	1	0.17		0	1	0	0	1
O=C([O-])c1cccc(Cl)n1	B02289597	0.0985	53.02	0	3	3	10	156.548	0	0.003		0	0	0	0	0
OB(O)c1ccc(Cl)nc1F	B02289599	-0.4461	53.35	2	3	5	11	175.355	0	0.121		0	0	0	0	0
Nc1ncccc1I	B02289600	1.2684	38.91	1	2	3	8	220.013	1	0.178		0	1	0	0	1
O=[N+]([O-])c1cnc(Br)[nH]1	B02289601	1.0804	71.82	1	3	4	9	191.972	2	0.191		1	0	0	1	2
O=C([O-])c1ccc(Cl)cn1	B02289602	0.0985	53.02	0	3	3	10	156.548	0	0.025		0	0	0	0	0
Nc1cccc(Br)c1O	B02289603	1.7369	46.25	2	2	4	9	188.024	0	0.157		0	0	0	0	0
O=C([O-])c1cncc(Cl)c1	B02289604	0.0985	53.02	0	3	3	10	156.548	1	0.018		1	0	0	0	1
Nc1ccc2[nH]nc(Br)c2c1	B02289605	1.9076	54.7	2	2	4	11	212.05	1	0.149		0	1	0	0	1
OCc1ccc(Cl)nc1	B02289606	1.2273	33.12	1	2	3	9	143.573	0	0.114		0	0	0	0	0
Nc1cnccc1I	B02289607	1.2684	38.91	1	2	3	8	220.013	1	0.341		1	0	0	0	1
COc1nc(N)ncc1I	B02289608	0.672	61.03	1	4	5	10	251.027	2	0.187		1	1	0	0	2
[NH3+]Cc1cc(Br)no1	B02289609	0.179	53.67	1	2	3	8	178.009	0	0.286		0	0	0	0	0
Brc1cnn2cccnc12	B02289610	1.4918	30.19	0	3	3	10	198.023	2	0.161		1	1	0	0	2
O=C([O-])c1cncc(Cl)n1	B02289611	-0.5065	65.91	0	4	4	10	157.536	0	0.015		0	0	0	0	0
Nc1ncc(Br)cc1C(=O)[O-]	B02289612	-0.2102	79.04	1	4	5	11	216.014	1	0.038		0	0	0	1	1
CCOC(=O)c1coc(Cl)n1	B02289613	1.5047	52.33	0	4	4	11	175.571	0	0.154		0	0	0	0	0
O=C([O-])c1ncccc1Br	B02289614	0.2076	53.02	0	3	3	10	200.999	0	0.029		0	0	0	0	0
O=C([O-])c1ccc(Cl)c(O)c1	B02289615	0.4091	60.36	1	3	4	11	171.559	0	0.028		0	0	0	0	0
Cc1ccc(N)c(Cl)n1	B02289616	1.62562	38.91	1	2	3	9	142.589	1	0.113		1	0	0	0	1
Brc1cnc2cnccn12	B02289617	1.4918	30.19	0	3	3	10	198.023	1	0.186		0	1	0	0	1
O=c1[nH]cnc([O-])c1Br	B02289618	-0.394	68.81	1	3	4	9	189.976	0	0.141		0	0	0	0	0
Cc1ncccc1Br	B02289619	2.15252	12.89	0	1	1	8	172.025	1	0.158		0	1	0	0	1
Cn1ccc(Br)n1	B02289620	1.1826	17.82	0	2	2	7	161.002	1	0.149		0	0	0	1	1
Nc1ncnc(Cl)c1Cl	B02289621	1.3656	51.8	1	3	4	9	163.995	2	0.144	0.127	1	1	0	0	2
Brc1cncnc1	B02289809	1.2391	25.78	0	2	2	7	158.986	0	0.174		0	0	0	0	0
Brc1cnc(N2CCC[NH2+]CC2)nc1	B02290087	0.0126	45.63	1	3	4	14	258.143	1	0.251		0	1	0	0	1
COc1ccc(C[NH3+])c(Cl)c1	B02290088	1.0905	36.87	1	1	2	11	172.635	0	0.258		0	0	0	0	0
CN(N)c1ncc(C(F)(F)F)cc1Cl	B02290089	2.0637	42.15	1	3	4	14	225.601	0	0.143		0	0	0	0	0
Nc1c(Cl)cc(Cl)cc1C[NH3+]	B02290090	1.3175	53.66	2	1	3	11	192.069	0	0.247	0.232	0	0	0	0	0
COc1ccc(I)cc1C[NH2+]CCO	B02290112	0.3555	46.07	2	2	4	14	308.139	0	0.281		0	0	0	0	0
Brc1cnn(-c2nnn[n-]2)c1	B02290113	-0.223	70.59	0	5	5	11	214.006	2	0.063		1	0	0	1	2
CC(C(=O)[O-])n1cc(Br)cn1	B02290114	-0.0435	57.95	0	4	4	11	218.03	0	0.051		0	0	0	0	0
O=C(c1cc(Br)c[nH]1)N1CCOCC1	B02290115	1.2496	45.33	1	2	3	14	259.103	1	0.154		0	1	0	0	1
Cn1ncc(Br)c1C(=O)[O-]	B02290116	-0.4539	57.95	0	4	4	10	204.003	1	0.023		0	0	0	1	1
[NH3+]CCCn1cc(Cl)cn1	B02290117	0.1685	45.46	1	2	3	10	160.628	0	0.201		0	0	0	0	0
NC(=O)c1nc(Cl)n[n-]1	B02290118	-0.8139	82.97	1	3	4	9	145.529	0	-0.021		0	0	0	0	0
O=C([O-])CCc1nc(Br)n[nH]1	B02290119	-0.7503	81.7	1	4	5	11	219.018	0	0.025		0	0	0	0	0
Cn1nc(Br)nc1NN	B02290120	-0.1368	68.76	2	5	7	9	192.02	1	0.158		0	1	1	0	2
Clc1ccc(CN2CC[NH2+]CC2)cn1	B02290121	0.114	32.74	1	2	3	14	212.704	0	0.193		0	0	0	0	0
Brc1csc(CN2CC[NH2+]CC2)c1	B02290122	0.8896	19.85	1	2	3	13	262.196	0	0.233		0	0	0	0	0
Cc1c(Cl)c([N+](=O)[O-])nn1CC(=O)[O-]	B02290123	-0.49698	101.09	0	6	6	14	218.576	1	0.036		0	0	0	1	1
O=C(c1ccc(Br)cc1)C12CN3CN(CN(C3)C1)C2	B02290401	1.4375	26.79	0	4	4	19	322.206	0	0.243		0	0	0	0	0
O=S(=O)(CCO)c1n[n-]c(Cl)n1	B02290402	-1.1468	94.25	1	5	6	12	210.622	0	-0.004		0	0	0	0	0
COCn1nc(Br)nc1C(N)=O	B02290403	-0.2566	83.03	1	5	6	12	235.041	1	0.163		1	0	0	0	1
COCn1nc(Br)[n-]c1=O	B02290404	-0.4331	58.22	0	4	4	10	207.007	0	0.188		0	0	0	0	0
Brc1cnc(C2OCCO2)s1	B02290407	1.951	31.35	0	4	4	11	236.09	1	0.176		1	0	0	0	1
O=C([O-])C(=O)Nc1ccc(Cl)cn1	B02290408	-0.5766	82.12	1	4	5	13	199.573	0	0.042		0	0	0	0	0
Cc1n[nH]c(C)c1I	B02290459	1.63114	28.68	1	1	2	8	222.029	4	0.186		1	1	1	1	4
O=c1[nH]cc(Cl)cc1[N+](=O)[O-]	B02290460	0.9365	76	1	3	4	11	174.543	1	0.006		0	1	0	0	1
Nc1ncc(Br)s1	B02290461	1.4878	38.91	1	3	4	7	179.042	0	0.168		0	0	0	0	0
Brc1nnc2n1CC[NH2+]C2	B02290462	-0.8824	47.32	1	3	4	10	204.051	0	0.177		0	0	0	0	0
O=C([O-])c1n[nH]cc1Br	B02290463	-0.4643	68.81	1	3	4	9	189.976	0	0.023		0	0	0	0	0
N#Cc1n[nH]cc1Br	B02290464	1.04388	52.47	1	2	3	8	171.985	3	0.18		1	1	0	1	3
Cn1c(Cl)cc(=O)n(C)c1=O	B02290465	-0.2626	44	0	4	4	11	174.587	1	0.154		1	0	0	0	1
O=C([O-])c1ccc(Cl)o1	B02290466	0.2965	53.27	0	3	3	9	145.521	0	0.025		0	0	0	0	0
O=C1Nc2c(Cl)cccc2C1=O	B02290467	1.4748	46.17	1	2	3	12	181.578	0	0.146		0	0	0	0	0
Clc1cnc2nn[n-]c2c1	B02290468	0.6354	52.77	0	3	3	10	153.552	0	0.141		0	0	0	0	0
Brc1cnc2cccnn12	B02290469	1.4918	30.19	0	3	3	10	198.023	2	0.173		0	1	0	1	2
O=C([O-])c1cc(Cl)nnc1Cl	B02290470	0.1469	65.91	0	4	4	11	191.981	0	0.025	0.002	0	0	0	0	0
Nc1c(Cl)ccc(O)c1Cl	B02290471	2.2812	46.25	2	2	4	10	178.018	1	0.137	0.124	1	0	0	0	1
Nc1ncnc(C(=O)[O-])c1Cl	B02290472	-0.9243	91.93	1	5	6	11	172.551	0	0.001		0	0	0	0	0
Fc1cnccc1I	B02290473	1.8253	12.89	0	1	1	8	222.988	2	0.206		1	1	0	0	2
O=c1[nH]c2ccc(Cl)nc2[nH]1	B02290474	0.9046	61.54	2	2	4	11	169.571	1	0.12		1	0	0	0	1
Nc1ncc(Br)cc1CO	B02290475	0.9186	59.14	2	3	5	10	203.039	2	0.152		1	1	0	0	2
Nc1nc(Cl)nc2[nH]cnc12	B02290476	0.5885	80.48	2	4	6	11	169.575	0	0.109		0	0	0	0	0
Clc1cscn1	B02290477	1.7965	12.89	0	2	2	6	119.576	0	0.126		0	0	0	0	0
CC(Cn1cc(Cl)cn1)C(=O)[O-]	B02290481	-0.0775	57.95	0	4	4	12	187.606	0	0.039		0	0	0	0	0
Brc1cnc2[n-]nnc2c1	B02290482	0.7445	52.77	0	3	3	10	198.003	0	0.174		0	0	0	0	0
C[NH+]1CCN(C(C[NH3+])c2ccccc2Cl)CC1	B02290483	-0.5467	35.32	2	1	3	17	255.793	0	0.327		0	0	0	0	0
Cc1onc(N)c1I	B02290521	1.16982	52.05	1	3	4	8	224.001	3	0.205		1	1	0	1	3
Cc1nn(C)c(Cl)c1S(N)(=O)=O	B02290522	0.02932	77.98	1	4	5	12	209.658	2	0.147		1	0	0	1	2
O=C([O-])c1cc(Br)c[nH]c1=O	B02290523	-0.4991	72.99	1	3	4	11	216.998	0	0.047		0	0	0	0	0
Cn1c(=O)cc(Cl)[n-]c1=O	B02290524	-0.6439	53.17	0	3	3	10	159.552	0	0.159		0	0	0	0	0
Cc1ccc(Cl)c(C[NH3+])c1F	B02290525	1.52942	27.64	1	0	1	11	174.626	0	0.265		0	0	0	0	0
O=C([O-])c1c(I)ccnc1F	B02290658	0.1888	53.02	0	3	3	11	265.989	0	0.067		0	0	0	0	0
O=C([O-])c1nccc(Cl)c1Cl	B02290659	0.7519	53.02	0	3	3	11	190.993	0	0.027	0.007	0	0	0	0	0
CN(C)S(=O)(=O)n1nccc1Br	B02290660	0.3001	55.2	0	4	4	12	254.109	2	0.171		1	0	1	0	2
CC(=O)c1c[nH]c2ncnc(Cl)c12	B02290661	1.8139	58.64	1	3	4	13	195.609	3	0.13		1	1	0	1	3
[O-]c1occ(O)c1Br	B02291100	0.8213	56.43	1	3	4	8	177.961	0	0.011		0	0	0	0	0
Cc1nc(N)nc(Cl)c1Cl	B02291102	1.67402	51.8	1	3	4	10	178.022	3	0.124	0.131	1	1	0	1	3
CCn1ncc(Br)c1C(N)=O	B02291150	0.7644	60.91	1	3	4	11	218.054	2	0.174		1	1	0	0	2
Cc1nn(CC[NH3+])cc1Cl	B02291152	0.08682	45.46	1	2	3	10	160.628	0	0.212		0	0	0	0	0
Oc1ccc(Cl)cc1/C=C/C12CN3CN(CN(C3)C1)C2	B02291153	1.8645	29.95	1	4	5	20	291.782	0	0.188		0	0	0	0	0
O=C([O-])c1nn(Cn2cccn2)cc1Cl	B02291154	-0.3977	75.77	0	6	6	15	225.615	0	0.006		0	0	0	0	0
CCn1ncc(Br)c1C[NH2+]C	B02291155	0.3587	34.43	1	2	3	11	219.106	0	0.294		0	0	0	0	0
Nc1nn(CC(=O)[O-])cc1Br	B02291156	-1.0223	83.97	1	5	6	11	219.018	0	0.051		0	0	0	0	0
Brc1cccc2c1C[NH2+]C2	B02291212	1.0261	16.61	1	0	1	10	199.071	0	0.277		0	0	0	0	0
CS(=O)(=O)c1ccc(Cl)c(S(C)(=O)=O)c1	B02291213	1.147	68.28	0	4	4	15	268.743	0	0.147		0	0	0	0	0
Cn1nc(C(F)(F)F)c(CO)c1Cl	B02291214	1.5846	38.05	1	3	4	13	214.574	0	0.15		0	0	0	0	0
Cn1c2nc(Cl)nc-2c([O-])n(C)c1=O	B02291216	-0.6544	75.77	0	6	6	14	213.604	3	0.151		1	1	0	1	3
Nc1c(Cl)ccc2nonc12	B02291217	1.4584	64.94	1	4	5	11	169.571	1	0.133		1	0	0	0	1
Cc1c(Cl)c(C(=O)[O-])nn1C	B02291218	-0.25458	57.95	0	4	4	11	173.579	0	-0.011		0	0	0	0	0
Nc1ncc(C(F)(F)F)cc1Cl	B02291219	2.336	38.91	1	2	3	12	196.559	2	0.141		1	1	0	0	2
O=C([O-])c1cc(Cl)c[nH]1	B02291221	0.0316	55.92	1	2	3	9	144.537	0	0.003		0	0	0	0	0
NC(=O)c1cc2c(nc1Cl)CCC2	B02291222	1.3226	55.98	1	2	3	13	196.637	0	0.127		0	0	0	0	0
CS(=O)(=O)c1ncc(Cl)c(C(=O)[O-])n1	B02291223	-1.103	100.05	0	6	6	14	235.628	0	0.028		0	0	0	0	0
Clc1ncccn1	B02291224	1.13	25.78	0	2	2	7	114.535	0	0.12		0	0	0	0	0
CCOC(Cn1cc(Cl)cn1)OCC	B02291225	1.9356	36.28	0	4	4	14	218.684	1	0.121		0	0	0	1	1
[NH3+]C1CCSc2ccc(Cl)cc21	B02291226	2.1188	27.64	1	1	2	12	200.714	0	0.228		0	0	0	0	0
Cc1ccc(C(N)=O)c(Cl)n1	B02291227	1.14232	55.98	1	2	3	11	170.599	1	0.129		1	0	0	0	1
O=C([O-])c1csc(Cl)n1	B02291228	0.16	53.02	0	4	4	9	162.577	0	0.027		0	0	0	0	0
Clc1cccc2nnnn12	B02291229	0.7777	43.08	0	4	4	10	154.56	0	0.157		0	0	0	0	0
Nc1c(Cl)ncnc1NC1CC1	B02291230	1.2865	63.83	2	4	6	12	184.63	2	0.12		1	1	0	0	2
Nc1ccc(Br)cn1	B02291232	1.4263	38.91	1	2	3	8	173.013	1	0.151		1	0	0	0	1
OCc1c(Cl)nc2sccn12	B02291233	1.5415	37.53	1	4	5	11	188.639	1	0.118		1	0	0	0	1
Cn1c(Cl)c(C#N)c(=O)n(C)c1=O	B02291234	-0.39092	67.79	0	5	5	13	199.597	4	0.169		1	1	1	1	4
OCc1cc2c(cc1Cl)OCO2	B02291235	1.561	38.69	1	3	4	12	186.594	1	0.119		0	1	0	0	1
O=S(=O)(c1ccc(Cl)s1)N1CCNCC1	B02291236	0.9954	49.41	1	4	5	15	266.775	0	0.242		0	0	0	0	0
CC(C)c1nsc(Cl)n1	B02291237	2.3149	25.78	0	3	3	9	162.645	0	0.146		0	0	0	0	0
Nc1ncc(F)cc1I	B02291238	1.4075	38.91	1	2	3	9	238.003	0	0.198		0	0	0	0	0
O=C([O-])c1ccnc(Cl)c1	B02291239	0.0985	53.02	0	3	3	10	156.548	0	0.005		0	0	0	0	0
Clc1cnccn1	B02291240	1.13	25.78	0	2	2	7	114.535	0	0.13		0	0	0	0	0
Clc1ccc(CN2CC[NH2+]CC2)s1	B02291241	0.7805	19.85	1	2	3	13	217.745	0	0.21		0	0	0	0	0
[NH3+]Cc1cc(Cl)c2c(c1)OCCCO2	B02291242	1.2432	46.1	1	2	3	14	214.672	0	0.219		0	0	0	0	0
Cc1nn(CC(=O)[O-])c(C)c1Cl	B02291243	-0.09676	57.95	0	4	4	12	187.606	2	0.017		0	1	0	1	2
Nc1cc(Cl)cc([N+](=O)[O-])c1[O-]	B02291244	0.904	92.22	1	4	5	12	187.562	0	0.128		0	0	0	0	0
O=C([O-])c1ccc(Br)cn1	B02291245	0.2076	53.02	0	3	3	10	200.999	0	0.056		0	0	0	0	0
COc1cc(OC)nc(Cl)n1	B02291246	1.1472	44.24	0	4	4	11	174.587	2	0.115		1	0	0	1	2
O=C([O-])C(O)c1ccccc1Cl	B02291247	0.1233	60.36	1	3	4	12	185.586	0	0.007		0	0	0	0	0
O=c1[n-]cc(Br)c(=O)[nH]1	B02291248	-0.5452	64.03	1	2	3	9	189.976	2	0.172		1	1	0	0	2
O=C([O-])Cc1ccc(Cl)nc1	B02291249	0.0274	53.02	0	3	3	11	170.575	0	0.016		0	0	0	0	0
Cc1nn(CCO)c(N)c1I	B02291250	0.37062	64.07	2	4	6	11	267.07	1	0.187		0	1	0	0	1
O=C([O-])c1cnc(Cl)cn1	B02291251	-0.5065	65.91	0	4	4	10	157.536	0	0.022		0	0	0	0	0
Cn1nc(Br)c(C(=O)NCC(=O)[O-])c1N	B02291252	-1.7555	113.07	2	6	8	15	276.07	1	0.05		1	0	0	0	1
O=C1CCS(=O)(=O)c2ccc(Cl)cc21	B02291253	1.7001	51.21	0	3	3	14	230.672	1	0.138		0	1	0	0	1
Clc1ncnc2[nH]ccc12	B02291254	1.6113	41.57	1	2	3	10	153.572	3	0.12		1	1	0	1	3
O=C1Nc2cccc(Cl)c2C1=O	B02291255	1.4748	46.17	1	2	3	12	181.578	0	0.13		0	0	0	0	0
Clc1cncc(-n2cccn2)n1	B02291256	1.3157	43.6	0	4	4	12	180.598	2	0.133		1	1	0	0	2
N#Cc1ccc([O-])c(Cl)c1	B02291257	1.28528	46.85	0	2	2	10	152.56	1	0.149		1	0	0	0	1
O=C([O-])c1cccnc1Cl	B02291258	0.0985	53.02	0	3	3	10	156.548	0	-0.016		0	0	0	0	0
Nc1ccc(C(=O)[O-])c(Cl)c1	B02291259	0.2857	66.15	1	3	4	11	170.575	0	-0.017		0	0	0	0	0
Nc1ccc(Cl)c(C(=O)[O-])c1	B02291260	0.2857	66.15	1	3	4	11	170.575	0	-0.018		0	0	0	0	0
O=C([O-])c1cncc(Br)c1	B02291261	0.2076	53.02	0	3	3	10	200.999	2	0.049		1	0	1	0	2
Fc1ncccc1I	B02291262	1.8253	12.89	0	1	1	8	222.988	0	0.203		0	0	0	0	0
NS(=O)(=O)c1cc(C(=O)[O-])ccc1Cl	B02291263	-0.6491	100.29	1	4	5	14	234.64	0	0.034		0	0	0	0	0
O=C([O-])c1cc(Br)c[nH]1	B02291264	0.1407	55.92	1	2	3	9	188.988	0	0.035		0	0	0	0	0
Clc1n[nH]c2ccccc12	B02291265	2.2163	28.68	1	1	2	10	152.584	2	0.123		1	1	0	0	2
Cn1c2nc(Br)nc-2c([O-])n(C)c1=O	B02291266	-0.5453	75.77	0	6	6	14	258.055	3	0.184		1	1	0	1	3
Clc1cnc(Cl)nc1	B02291267	1.7834	25.78	0	2	2	8	148.98	0	0.149	0.128	0	0	0	0	0
COc1cc(CO)cc(I)c1O	B02291268	1.4977	49.69	2	3	5	12	280.061	1	0.193		0	0	0	1	1
Clc1ccncc1	B02291269	1.735	12.89	0	1	1	7	113.547	0	0.131		0	0	0	0	0
CCC([NH3+])c1ccc(Cl)cc1	B02291270	2.033	27.64	1	0	1	11	170.663	4	0.222		1	1	1	1	4
N#Cc1ccnc(Cl)c1	B02291271	1.60668	36.68	0	2	2	9	138.557	0	0.135		0	0	0	0	0
Brc1noc(C2CC2)n1	B02291272	1.7095	38.92	0	3	3	9	189.012	0	0.174		0	0	0	0	0
CNc1cc(Cl)c2c(c1)OCO2	B02294481	2.1104	30.49	1	3	4	12	185.61	0	0.118		0	0	0	0	0
FC(F)(F)c1cnc(Cl)nc1	B02294482	2.1488	25.78	0	2	2	11	182.532	0	0.134		0	0	0	0	0
Cc1n[nH]c(C(=O)[O-])c1Br	B02294483	-0.15588	68.81	1	3	4	10	204.003	1	0.023		1	0	0	0	1
Oc1ccc(Cl)cc1	B02294485	2.0456	20.23	1	1	2	8	128.558	0	0.117		0	0	0	0	0
Clc1cnc2ccccn12	B02294486	1.9877	17.3	0	2	2	10	152.584	3	0.287		1	1	0	1	3
COc1cc(Cl)cnc1OC	B02297394	1.7522	31.35	0	3	3	11	173.599	3	0.12		1	1	0	1	3
Nc1ccc(Br)c(C(=O)[O-])n1	B02297395	-0.2102	79.04	1	4	5	11	216.014	0	0.025		0	0	0	0	0
COc1ncc(Br)cc1C(=O)[O-]	B02297396	0.2162	62.25	0	4	4	12	231.025	0	0.046		0	0	0	0	0
Fc1cc(C2CNCC[NH2+]2)c(Cl)cc1Cl	B02297397	1.3402	28.64	2	1	3	15	250.124	0	0.236	0.219	0	0	0	0	0
O=C([O-])c1sccc1Cl	B02297398	0.765	40.13	0	3	3	9	161.589	0	-0.011		0	0	0	0	0
OB(O)c1ccncc1Br	B02297399	-0.4761	53.35	2	3	5	10	201.816	0	0.148		0	0	0	0	0
O=C(c1ccc(Cl)cc1)N1CCOCC1	B02297400	1.8124	29.54	0	2	2	15	225.675	0	0.125		0	0	0	0	0
Oc1cccc(O)c1Br	B02297401	1.8603	40.46	2	2	4	9	189.008	1	0.174		1	0	0	0	1
Cc1cnc(C)c(Cl)n1	B02297402	1.74684	25.78	0	2	2	9	142.589	1	0.121		1	0	0	0	1
O=C([O-])c1cnccc1Br	B02297403	0.2076	53.02	0	3	3	10	200.999	0	0.027		0	0	0	0	0
C[NH+]1CCN(c2ccc(Br)cn2)CC1	B02297404	0.1788	20.57	1	2	3	14	257.155	0	0.238		0	0	0	0	0
Cc1c(Cl)cnc(N)c1Cl	B02297405	2.27902	38.91	1	2	3	10	177.034	3	0.133	0.125	1	1	1	0	3
Cc1cc(N)c(Br)c[nH+]1	B02297406	1.15382	40.16	1	1	2	9	188.048	1	0.157		1	0	0	0	1
COC(=O)c1cc(N)c(Cl)s1	B02297407	1.7703	52.32	1	4	5	11	191.639	2	0.134		1	0	1	0	2
Brc1ccc(C2C[NH2+]CCN2)s1	B02297408	0.7183	28.64	2	2	4	12	248.169	0	0.258		0	0	0	0	0
Nc1ccc2[nH]cnc2c1Br	B02297409	1.9076	54.7	2	2	4	11	212.05	1	0.141		1	0	0	0	1
OC1CCN(c2cc(Cl)ncn2)CC1	B02297410	1.0911	49.25	1	4	5	14	213.668	1	0.118		1	0	0	0	1
O=C([O-])c1c(Cl)cncc1Cl	B02297411	0.7519	53.02	0	3	3	11	190.993	1	0.005	0.005	0	0	0	1	1
Nc1nc(Cl)c(NC=O)c(Cl)n1	B02297412	0.9339	80.9	2	4	6	12	207.02	0	0.141	0.138	0	0	0	0	0
O=C([O-])c1cc(Br)c(O)cc1O	B02297413	0.2238	80.59	2	4	6	12	232.009	2	0.051		1	0	0	1	2
Clc1nsnc1N1CCOCC1	B02297414	1.0281	38.25	0	5	5	12	205.67	0	0.138		0	0	0	0	0
Cn1cc(Br)c(N)n1	B02297415	0.7648	43.84	1	3	4	8	176.017	0	0.152		0	0	0	0	0
CC(=O)Nc1ccc(Cl)c(C(=O)[O-])n1	B02297416	0.0569	82.12	1	4	5	14	213.6	0	0.003		0	0	0	0	0
O=C([O-])C(O)c1cccc(Cl)c1	B02297417	0.1233	60.36	1	3	4	12	185.586	0	0.018		0	0	0	0	0
O=C([O-])c1ncc(Cl)cc1Cl	B02297418	0.7519	53.02	0	3	3	11	190.993	0	0.032	0.008	0	0	0	0	0
O=C([O-])c1cc(Cl)c[nH]c1=O	B02297419	-0.6082	72.99	1	3	4	11	172.547	0	0.024		0	0	0	0	0
Cc1[nH]c(=O)[nH]c(=O)c1I	B02297420	-0.02378	65.72	2	2	4	10	252.011	3	0.2		1	0	1	1	3
[O-][n+]1ccc(Cl)cc1	B02297421	0.9734	26.94	0	1	1	8	129.546	0	0.135		0	0	0	0	0
Brc1cnc(N2CC[NH2+]CC2)nc1	B02297422	-0.3775	45.63	1	3	4	13	244.116	2	0.251		1	1	0	0	2
COc1ncc(C(=O)[O-])cc1Cl	B02297423	0.1071	62.25	0	4	4	12	186.574	3	0.016		1	1	0	1	3
Nc1cnccc1Br	B02297424	1.4263	38.91	1	2	3	8	173.013	2	0.161		1	1	0	0	2
O=c1ncc(Cl)c[nH]1	B02297425	0.4233	45.75	1	2	3	8	130.534	1	0.145		0	0	0	1	1
O=C([O-])c1ccncc1Br	B02297426	0.2076	53.02	0	3	3	10	200.999	0	0.026		0	0	0	0	0
O=c1cc([O-])c(Cl)c[nH]1	B02297427	0.1019	55.92	1	2	3	9	144.537	1	0.117		0	0	0	1	1
Cc1ccc(C(=O)[O-])c(Cl)n1	B02297428	0.40692	53.02	0	3	3	11	170.575	0	-0.017		0	0	0	0	0
COc1ncc(Cl)cc1C(=O)[O-]	B02297429	0.1071	62.25	0	4	4	12	186.574	1	0.015		0	0	0	1	1
Nc1ncc(C(=O)[O-])cc1Br	B02297655	-0.2102	79.04	1	4	5	11	216.014	0	0.049		0	0	0	0	0
CC(=O)CS(=O)(=O)c1cc(Cl)ccc1F	B02297765	1.8418	51.21	0	3	3	15	250.678	0	0.135		0	0	0	0	0
Cn1ncc(I)c1C(=O)NN	B02297766	-0.3718	72.94	2	4	6	11	266.042	0	0.192		0	0	0	0	0

## Sheet: Datasheet 2
complete Heflib							Chlorine containing fragments							Bromine containing fragments							Iodine containing fragments
No Hit	Hit						No Hit	Hit						No Hit	Hit						No Hit	Hit
0.003	0.13						0.003	0.13						0.157	0.17						0.281	0.178	1
0.121	0.17						0.121	0.018						0.174	0.174						0.067	0.341	1
0.025	0.178						0.025	0.113						0.286	0.191						0.198	0.187	2
0.157	0.191						0.114	0.147						0.141	0.171						0.203	0.186	4
0.114	0.018						0.015	0.12						0.174	0.149						0.192	0.206	2
0.286	0.149						0.154	0.137						0.029	0.163							0.187	1
0.015	0.341						0.028	0.144						0.168	0.176							0.2	3
0.154	0.187						0.258	0.13						0.177	0.161							0.205	3
0.029	0.161						0.143	0.124						0.023	0.038							0.193	1
0.028	0.038	t-Test: Two-Sample Assuming Unequal Variances					0.247	0.154	t-Test: Two-Sample Assuming Unequal Variances					0.051	0.152	t-Test: Two-Sample Assuming Unequal Variances							t-Test: Two-Sample Assuming Unequal Variances
0.141	0.113						0.201	0.006						0.188	0.186
0.174	0.186		Variable 1	Variable 2			-0.021	0.222		Variable 1	Variable 2			0.025	0.158		Variable 1	Variable 2						Variable 1	Variable 2
0.258	0.158	Mean	0.11189	0.137963			0.193	0.036	Mean	0.0996164	0.1172			0.233	0.149	Mean	0.128484	0.143875					Mean	0.1882	0.209222
0.143	0.149	Variance	0.00814351	0.00398556			-0.004	0.151	Variance	0.00752452	0.00316811			0.243	0.18	Variance	0.00884846	0.00358005					Variance	0.0059077	0.00253044
0.247	0.144	Observations	109	81			0.042	0.133	Observations	73	40			0.047	0.251	Observations	31	32					Observations	5	9
0.281	0.251	Hypothesized Mean Difference	0				0.025	0.141	Hypothesized Mean Difference	0				0.011	0.063	Hypothesized Mean Difference	0						Hypothesized Mean Difference	0
0.051	0.063	df	187				0.146	0.121	df	108				0.294	0.154	df	51						df	6
0.201	0.154	t Stat	-2.34223				0.141	0.129	t Stat	-1.30238				0.051	0.023	t Stat	-0.772157						t Stat	-0.549669
-0.021	0.023	P(T<=t) one-tail	0.0101106				0.025	0.12	P(T<=t) one-tail	0.0977777				0.277	0.158	P(T<=t) one-tail	0.221793						P(T<=t) one-tail	0.301195
0.025	0.158	t Critical one-tail	2.06817				0.001	0.123	t Critical one-tail	1.65909				0.056	0.173	t Critical one-tail	1.67528						t Critical one-tail	1.94318
0.193	0.036	P(T<=t) two-tail	0.0202212				0.109	0.118	P(T<=t) two-tail	0.195555				0.035	0.151	P(T<=t) two-tail	0.443585						P(T<=t) two-tail	0.60239
0.233	0.163	t Critical two-tail	2.34645				0.126	0.169	t Critical two-tail	1.98217				0.174	0.172	t Critical two-tail	2.00758						t Critical two-tail	2.44691
0.243	0.176						0.039	0.119						0.025	0.05
-0.004	0.186						0.327	0.017						0.046	0.049
0.188	0.006	Stdev	0.0902414	0.0631313			0.159	0.115	Stdev	0.086744	0.056286			0.148	0.161	Stdev	0.0940662	0.0598335					Stdev	0.0768616	0.0503035
0.042	0.18	rel Stdev	0.806519	0.457596			0.265	0.287	rel Stdev	0.87078	0.480256			0.152	0.184	rel Stdev	0.732125	0.415871					rel Stdev	0.408404	0.240431
0.168	0.154						0.027	0.12						0.027	0.251
0.177	0.173						0.212	0.138						0.238	0.051
0.023	0.137						0.188	0.12						0.258	0.023
0.025	0.206						0.006	0.133						0.049	0.141
0.146	0.12						0.147	0.149						0.026	0.157
0.141	0.152						0.15	0.121							0.174
0.025	0.205						-0.011	0.133
0.001	0.147						0.003	0.134
0.109	0.171						0.127	0.118
0.126	0.13						0.028	0.005
0.039	0.124						0.12	0.016
0.174	0.174						0.228	0.145
0.327	0.151						0.027	0.117
0.047	0.133						0.157	0.015
0.159	0.141						0.242
0.265	0.121						0.146
0.067	0.129						0.005
0.027	0.12						0.13
0.011	0.151						0.21
0.212	0.118						0.219
0.188	0.169						0.128
0.006	0.119						0.007
0.294	0.017						0.016
0.051	0.115						0.022
0.277	0.172						0.13
0.147	0.187						-0.016
0.15	0.05						-0.017
-0.011	0.138						-0.018
0.003	0.12						0.034
0.127	0.133						0.141
0.028	0.149						0.138
0.12	0.049						0.149
0.228	0.123						0.131
0.027	0.184						0.135
0.157	0.193						0.118
0.242	0.222						0.134
0.146	0.023						0.117
0.198	0.287						0.236
0.005	0.12						-0.011
0.13	0.174						0.135
0.21	0.121						0.125
0.219	0.133						0.003
0.128	0.157						0.018
0.056	0.134						0.032
0.007	0.141						0.024
0.016	0.118						0.135
0.022	0.005						-0.017
0.13	0.051
-0.016	0.2
-0.017	0.251
-0.018	0.016
0.203	0.161
0.034	0.145
0.035	0.117
0.149	0.015
0.131
0.135
0.174
0.118
0.134
0.117
0.025
0.046
0.236
-0.011
0.148
0.125
0.027
0.238
0.258
0.141
0.138
0.152
0.003
0.018
0.032
0.024
0.135
0.026
-0.017
0.049
0.135
0.192
